# Supplementary material
Source: ML conference proceedings conference paper supplement (https://openaccess.thecvf.com/content/CVPR2023/html/Wang_EfficientSCI_Densely_Connected_CVPR_2023_paper.html)
Supplement: Supplementary file 1 [file Wang_EfficientSCI_Densely_Connected_CVPR_2023_supplemental.pdf]

# Supplementary Material for “EfficientSCI: Densely Connected Network with Space-time Factorization for Large-scale Video Snapshot Compressive Imaging”

Lishun Wang<sup>1,2,\*</sup>, Miao Cao<sup>3,4,\*</sup>, and Xin Yuan<sup>3,†</sup>

<sup>1</sup> Chengdu Institute of Computer Application Chinese Academy of Sciences,

<sup>2</sup> University of Chinese Academy of Sciences, <sup>3</sup> Westlake University, <sup>4</sup> Zhejiang University

## 1. Results on Mid-scale Color Datasets

We compare our method with SOTA model-based methods (GAP-TV [6], DeSCI [3], PnP-FFDNet [7] and PnP-FastDVDnet [8]) and deep learning-based method (BIRNAT-color [2]) on six benchmark mid-scale color datasets (Beauty, Bosphorus, Jockey, Runner, ShakeNDry and Traffic with a size of  $512 \times 512 \times 3 \times 8$ ). Among them, PnP-FFDNet and PnP-FastDVDnet have grayscale and color versions, which are used to indicate that they use a grayscale denoiser and a color denoiser, respectively. Table 2 shows the quantitative comparison results, it can be observed that our proposed EfficientSCI-B (‘Base’ version) can achieve the highest reconstruction quality and good real-time performance. In particular, the PSNR value of our method surpasses the existing best method BIRNAT-color by 2.02 dB on average. In addition, our proposed EfficientSCI-S (‘Small’ version) achieves high reconstruction quality with the best real-time performance. Fig. 1 shows the visual reconstruction results of some simulation data. By zooming in some local areas, we can observe that our method can recover sharper edges and more detailed information compared to previous state-of-the-art (SOTA) methods (with artifacts or over-smoothing).

Table 1. Comparison of memory consumption (MB) between our proposed method and other Transformer architectures during runtime on large-scale color datasets.

| Method                   | Resolution                           | Memory (MB) |
|--------------------------|--------------------------------------|-------------|
| Swin                     | $1080 \times 1920 \times 3 \times 8$ | 13281       |
| VSwind <sup>d2</sup>     | $1080 \times 1920 \times 3 \times 8$ | 19589       |
| VSwind <sup>d4</sup>     | $1080 \times 1920 \times 3 \times 8$ | > 24000     |
| TimeSformer <sup>1</sup> | $512 \times 512 \times 3 \times 8$   | > 24000     |
| TimeSformer <sup>2</sup> | $1080 \times 1920 \times 3 \times 8$ | > 24000     |
| Ours                     | $1080 \times 1920 \times 3 \times 8$ | 8995        |

\*Equal Contribution, † Corresponding Author

## 2. Comparison with Other Transformer Network Architectures

To further validate the memory effectiveness of our proposed CFormer block on large-scale color datasets, we compare with some current SOTA Transformer networks, including Swin Transformer (Swin) [4], Video Swin Transformer (VSwind) [5] and TimeSformer [1]. We have verified that our proposed method can achieve higher reconstruction quality in previous experiments, so here we only compare the memory consumption of different networks during runtime.

Table 1 shows the memory consumption of different network blocks during runtime, where VSwind<sup>d2</sup> indicates that the local window depth is 2, VSwind<sup>d4</sup> indicates that the local window depth is 4, and the local window space size for Swin and VSwind is  $7 \times 7$ . Compared to other Transformer network blocks, our proposed CFormer block has a lower memory consumption. On large-scale color data with a size of  $1080 \times 1920 \times 3 \times 8$ , the CFormer block only needs 8995 MB memory consumption, which is 35% less than Swin Transformer and 85% less than Video Swin Transformer. For TimeSformer and VSwind<sup>d4</sup>, they cannot be applied to large-scale video reconstruction tasks due to the memory constraint.

## References

- [1] Gedas Bertasius, Heng Wang, and Lorenzo Torresani. Is space-time attention all you need for video understanding? In *ICML*, volume 2, page 4, 2021. 1
- [2] Ziheng Cheng, Bo Chen, Ruiying Lu, Zhengjue Wang, Hao Zhang, Ziyi Meng, and Xin Yuan. Recurrent neural networks for snapshot compressive imaging. *IEEE Transactions on Pattern Analysis and Machine Intelligence*, 2022. 1
- [3] Yang Liu, Xin Yuan, Jinli Suo, David J Brady, and Qionghai Dai. Rank minimization for snapshot compressive imaging. *IEEE transactions on pattern analysis and machine intelligence*, 41(12):2990–3006, 2018. 1
- [4] Ze Liu, Yutong Lin, Yue Cao, Han Hu, Yixuan Wei, Zheng Zhang, Stephen Lin, and Baining Guo. Swin transformer: Hierarchical vision transformer using shifted windows. In *Pro-*

Table 2. The average PSNR in dB (left entry), SSIM (right entry) and running time per measurement of different algorithms on 6 benchmark Mid-scale color datasets. Best results are in bold and the second-best results are underlined.

| Method               | Beauty                      | Bosphorus                   | Jockey                      | Runner                      | ShakeNDry                   | Traffic                     | Average                     | Running time(s) |
|----------------------|-----------------------------|-----------------------------|-----------------------------|-----------------------------|-----------------------------|-----------------------------|-----------------------------|-----------------|
| GAP-TV               | 33.08, 0.964                | 29.70, 0.914                | 29.48, 0.887                | 29.10, 0.878                | 29.59, 0.893                | 19.84, 0.645                | 28.47, 0.864                | 10.80 (CPU)     |
| DeSCI                | 34.66, 0.971                | 32.88, 0.952                | 34.14, 0.938                | 36.16, 0.949                | 30.94, 0.905                | 24.62, 0.839                | 32.23, 0.926                | 92640 (CPU)     |
| PnP-FFDNet-gray      | 33.21, 0.963                | 28.43, 0.905                | 32.30, 0.918                | 30.83, 0.888                | 27.87, 0.861                | 21.03, 0.711                | 28.93, 0.874                | 13.20 (GPU)     |
| PnP-FFDNet-color     | 34.15, 0.967                | 33.06, 0.957                | 34.80, 0.943                | 35.32, 0.940                | 32.37, 0.940                | 24.55, 0.837                | 32.38, 0.931                | 97.80 (GPU)     |
| PnP-FastDVDnet-gray  | 33.01, 0.963                | 30.95, 0.934                | 33.51, 0.928                | 32.82, 0.900                | 29.92, 0.892                | 22.81, 0.776                | 30.50, 0.899                | 19.80 (GPU)     |
| PnP-FastDVDnet-color | 35.27, 0.972                | 37.24, 0.971                | 35.63, 0.950                | 38.22, 0.965                | 33.71, 0.949                | 27.49, 0.915                | 34.60, 0.953                | 52.2 (GPU)      |
| BIRNAT-color         | 36.08, 0.975                | 38.30, 0.982                | 36.51, 0.956                | 39.65, 0.973                | 34.26, 0.951                | 28.03, 0.915                | 35.47, 0.959                | 0.98 (GPU)      |
| EfficientSCI-S       | <u>37.39</u> , <u>0.978</u> | <u>40.52</u> , <u>0.987</u> | <u>38.09</u> , <u>0.967</u> | <u>42.24</u> , <u>0.984</u> | <u>35.03</u> , <u>0.951</u> | <u>29.71</u> , <u>0.938</u> | <u>37.16</u> , <u>0.968</u> | 0.61 (GPU)      |
| EfficientSCI-B       | <b>37.51</b> , <b>0.979</b> | <b>40.89</b> , <b>0.988</b> | <b>38.49</b> , <b>0.969</b> | <b>42.73</b> , <b>0.985</b> | <b>35.19</b> , <b>0.953</b> | <b>30.13</b> , <b>0.943</b> | <b>37.49</b> , <b>0.970</b> | 1.31 (GPU)      |

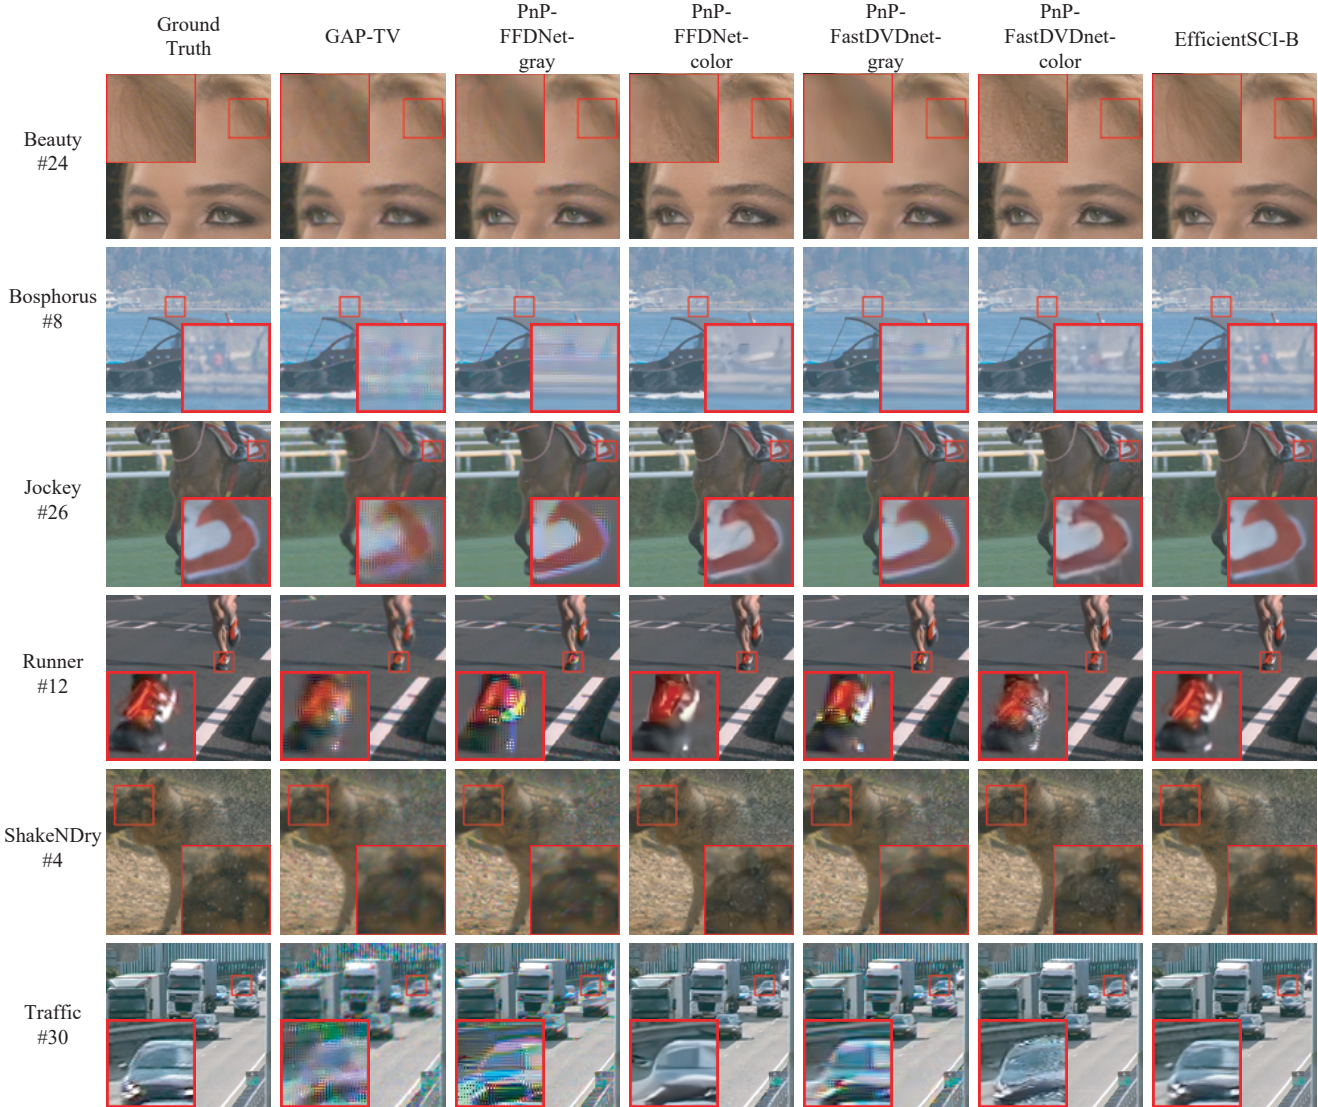

Figure 1. Selected reconstruction frames of simulated color data. Zoom in for better view.

ceedings of the IEEE/CVF International Conference on Computer Vision, pages 10012–10022, 2021. 1

Stephen Lin, and Han Hu. Video swin transformer. In *Proceedings of the IEEE/CVF Conference on Computer Vision and Pattern Recognition*, pages 3202–3211, 2022. 1

[5] Ze Liu, Jia Ning, Yue Cao, Yixuan Wei, Zheng Zhang,

- [6] Xin Yuan. Generalized alternating projection based total variation minimization for compressive sensing. In *2016 IEEE International Conference on Image Processing (ICIP)*, pages 2539–2543. IEEE, 2016. [1](#)
- [7] Xin Yuan, Yang Liu, Jinli Suo, and Qionghai Dai. Plug-and-play algorithms for large-scale snapshot compressive imaging. In *Proceedings of the IEEE/CVF Conference on Computer Vision and Pattern Recognition*, pages 1447–1457, 2020. [1](#)
- [8] Xin Yuan, Yang Liu, Jinli Suo, Fredo Durand, and Qionghai Dai. Plug-and-play algorithms for video snapshot compressive imaging. *IEEE Transactions on Pattern Analysis Machine Intelligence*, (01):1–1, 2021. [1](#)
